# Supplementary material
Source: PubMed Central journal article supplement (PMC6109939)
Supplement: supp_RA118.003996_138192_1_supp_159943_pny0lc.pdf [file supp_RA118.003996_138192_1_supp_159943_pny0lc.pdf]

Pyruvate dehydrogenase complex deficiency is linked to regulatory loop disorder in the  $\alpha$ V138M variant of human pyruvate dehydrogenase

**Matthew J. Whitley<sup>‡1</sup>, Palaniappa Arjunan<sup>‡1</sup>, Natalia S. Nemeria<sup>§1</sup>, Liubov G. Korotchkina<sup>¶</sup>, Yun-Hee Park<sup>¶</sup>, Mulchand S. Patel<sup>¶</sup>, Frank Jordan<sup>§</sup>, and William Furey<sup>‡†2</sup>**

From the <sup>‡</sup>Department of Pharmacology & Chemical Biology, University of Pittsburgh School of Medicine, Pittsburgh, PA 15261; <sup>§</sup>Department of Chemistry, Rutgers, the State University of New Jersey, Newark, NJ 07102; <sup>¶</sup>Department of Biochemistry, Jacobs School of Medicine and Biomedical Sciences, University at Buffalo, The State University of New York, Buffalo, NY 14203; <sup>†</sup>Biocrystallography Laboratory, Veterans Affairs Medical Center, Pittsburgh, PA 15240

Supplementary Figure S1

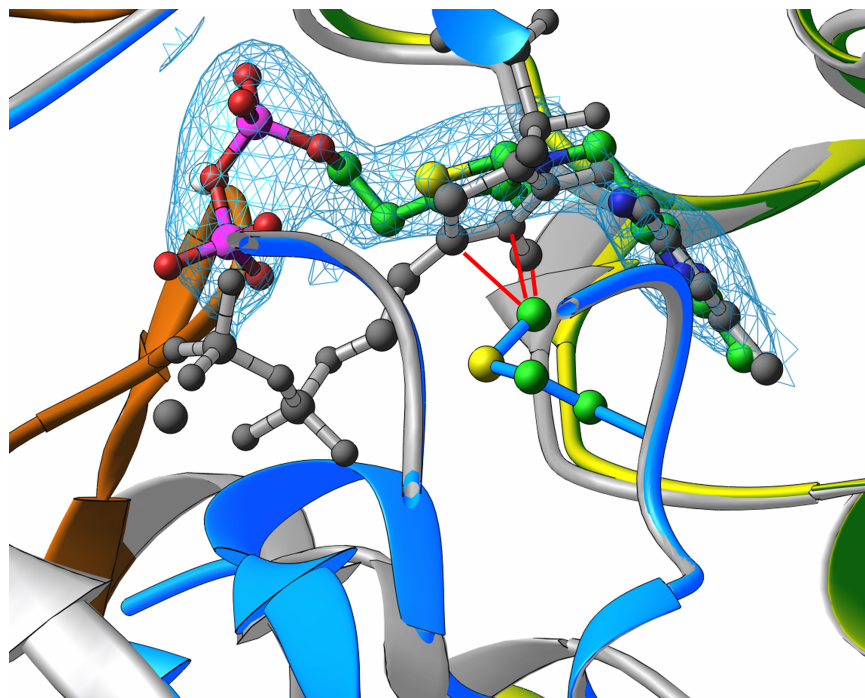

**Fig. S1.** An alternate orientation of Figure 3A in which the clashes between M138 and the C4, C4 $\alpha$ , and C5 atoms of ThDP in the WT-AcPhi structure are more readily apparent. The clashing atoms are connected by red lines.
